# Supplementary material for: Application of a loop-mediated isothermal amplification (LAMP) assay targeting cox1 gene for the detection of Clonorchis sinensis in human fecal samples
Source: PubMed Central journal article supplement (PMC5648269; doi:10.1371/journal.pntd.0005995), 2017-10-09

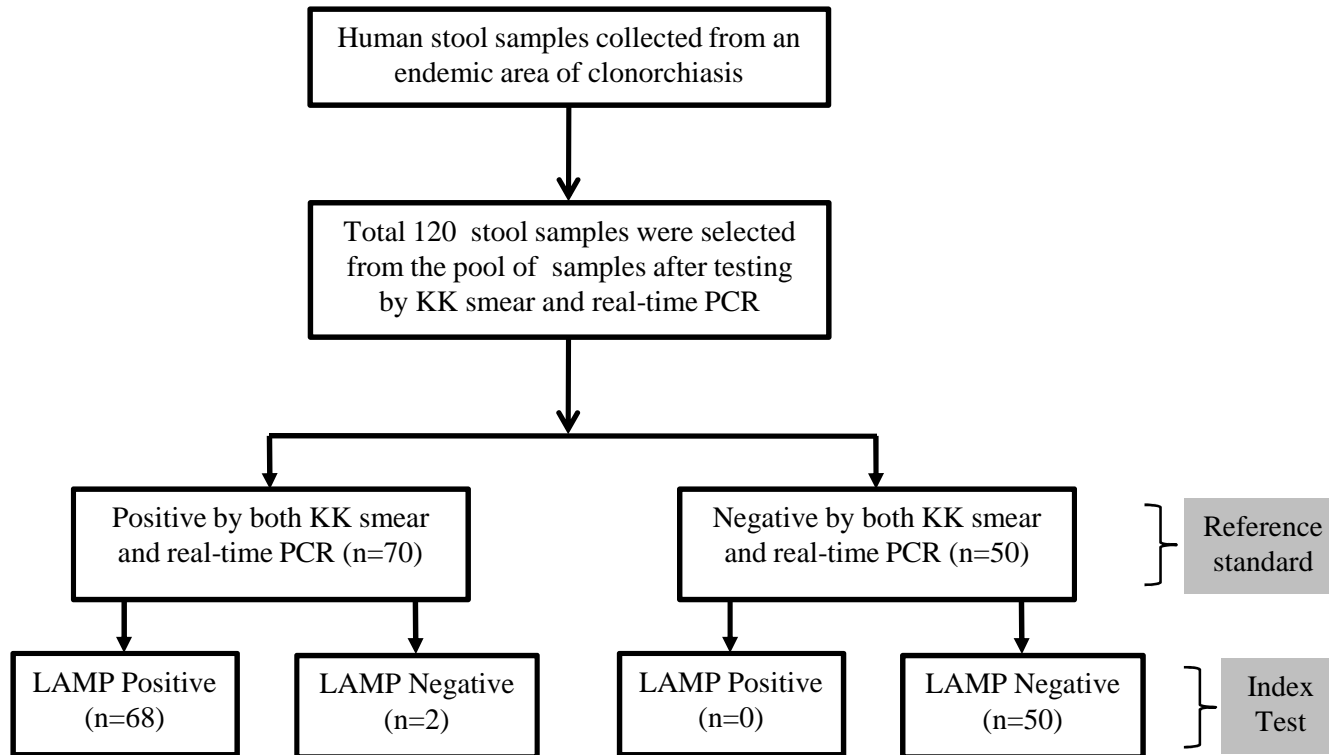

Supplement: pntd.0005995.s001.pdf [file pntd.0005995.s001.pdf]
