# Supplementary material for: Application of a loop-mediated isothermal amplification (LAMP) assay targeting cox1 gene for the detection of Clonorchis sinensis in human fecal samples
Source: PubMed Central journal article supplement (PMC5648269; doi:10.1371/journal.pntd.0005995), 2017-10-09
Supplement: pntd.0005995.s002.pdf [file pntd.0005995.s002.pdf]

## STARD checklist for reporting of studies of diagnostic accuracy (version 2015)

| Section & Topic          | No         | Item                                                                                                                                                   | Reported on page # |
|--------------------------|------------|--------------------------------------------------------------------------------------------------------------------------------------------------------|--------------------|
| <b>TITLE OR ABSTRACT</b> |            |                                                                                                                                                        |                    |
|                          | <b>1</b>   | Identification as a study of diagnostic accuracy using at least one measure of accuracy (such as sensitivity, specificity, predictive values, or AUC)  | 1-4                |
| <b>ABSTRACT</b>          |            |                                                                                                                                                        |                    |
|                          | <b>2</b>   | Structured summary of study design, methods, results, and conclusions (for specific guidance, see STARD for Abstracts)                                 | 3-4                |
| <b>INTRODUCTION</b>      |            |                                                                                                                                                        |                    |
|                          | <b>3</b>   | Scientific and clinical background, including the intended use and clinical role of the index test                                                     | 6-7                |
|                          | <b>4</b>   | Study objectives and hypotheses                                                                                                                        | 7                  |
| <b>METHODS</b>           |            |                                                                                                                                                        |                    |
| <i>Study design</i>      | <b>5</b>   | Whether data collection was planned before the index test and reference standard were performed (prospective study) or after (retrospective study)     | 8-9                |
| <i>Participants</i>      | <b>6</b>   | Eligibility criteria                                                                                                                                   |                    |
|                          | <b>7</b>   | On what basis potentially eligible participants were identified (such as symptoms, results from previous tests, inclusion in registry)                 |                    |
|                          | <b>8</b>   | Where and when potentially eligible participants were identified (setting, location and dates)                                                         | 8                  |
|                          | <b>9</b>   | Whether participants formed a consecutive, random or convenience series                                                                                | 8                  |
| <i>Test methods</i>      | <b>10a</b> | Index test, in sufficient detail to allow replication                                                                                                  | 9-11               |
|                          | <b>10b</b> | Reference standard, in sufficient detail to allow replication                                                                                          | 8-9                |
|                          | <b>11</b>  | Rationale for choosing the reference standard (if alternatives exist)                                                                                  | 8-9                |
|                          | <b>12a</b> | Definition of and rationale for test positivity cut-offs or result categories of the index test, distinguishing pre-specified from exploratory         |                    |
|                          | <b>12b</b> | Definition of and rationale for test positivity cut-offs or result categories of the reference standard, distinguishing pre-specified from exploratory |                    |
|                          | <b>13a</b> | Whether clinical information and reference standard results were available to the performers/readers of the index test                                 |                    |
|                          | <b>13b</b> | Whether clinical information and index test results were available to the assessors of the reference standard                                          |                    |
| <i>Analysis</i>          | <b>14</b>  | Methods for estimating or comparing measures of diagnostic accuracy                                                                                    | 8-9                |
|                          | <b>15</b>  | How indeterminate index test or reference standard results were handled                                                                                |                    |
|                          | <b>16</b>  | How missing data on the index test and reference standard were handled                                                                                 |                    |
|                          | <b>17</b>  | Any analyses of variability in diagnostic accuracy, distinguishing pre-specified from exploratory                                                      |                    |
|                          | <b>18</b>  | Intended sample size and how it was determined                                                                                                         | 9                  |
| <b>RESULTS</b>           |            |                                                                                                                                                        |                    |
| <i>Participants</i>      | <b>19</b>  | Flow of participants, using a diagram                                                                                                                  | 28                 |
|                          | <b>20</b>  | Baseline demographic and clinical characteristics of participants                                                                                      |                    |
|                          | <b>21a</b> | Distribution of severity of disease in those with the target condition                                                                                 |                    |
|                          | <b>21b</b> | Distribution of alternative diagnoses in those without the target condition                                                                            |                    |
|                          | <b>22</b>  | Time interval and any clinical interventions between index test and reference standard                                                                 |                    |
| <i>Test results</i>      | <b>23</b>  | Cross tabulation of the index test results (or their distribution) by the results of the reference standard                                            | 13                 |
|                          | <b>24</b>  | Estimates of diagnostic accuracy and their precision (such as 95% confidence intervals)                                                                | 13                 |
|                          | <b>25</b>  | Any adverse events from performing the index test or the reference standard                                                                            |                    |
| <b>DISCUSSION</b>        |            |                                                                                                                                                        |                    |
|                          | <b>26</b>  | Study limitations, including sources of potential bias, statistical uncertainty, and generalisability                                                  | 18-19              |
|                          | <b>27</b>  | Implications for practice, including the intended use and clinical role of the index test                                                              | 13-19              |
| <b>OTHER INFORMATION</b> |            |                                                                                                                                                        |                    |
|                          | <b>28</b>  | Registration number and name of registry                                                                                                               |                    |
|                          | <b>29</b>  | Where the full study protocol can be accessed                                                                                                          | 2                  |
|                          | <b>30</b>  | Sources of funding and other support; role of funders                                                                                                  | 2                  |
